# Supplementary material for: Toward highly efficient blue organic light-emitting diodes: fabricating a good-quality emissive layer cast from suitable solvents
Source: Royal Society of Chemistry journal article supplement (doi:10.1039/c5dt03776j), 2015-11-09
Supplement: c5dt03776j1.pdf [file c5dt03776j1.pdf]

### Electronic Supplementary Information

**Figure S1. Performance of solution-processed OLEDs with the light-emitting layers cast from 1,2-dichloroethane with varied thickness of  $\text{Cs}_2\text{CO}_3$ .** The structure of OLED is ITO/ PEDOT: PSS (60 nm)/ PVK: OXD-7: 10 wt. % Flrpic (10 mg/mL)/  $\text{Cs}_2\text{CO}_3$  ( $y$  nm)/ Al (150 nm),  $y = 2.0, 2.3, 2.6$  or  $3.0$ . **(a)**  $J$  (current density) versus  $V$  (voltage), **(b)**  $L$  (luminance) versus  $V$  (voltage) characteristics and **(c)** electroluminescent spectra of OLEDs.

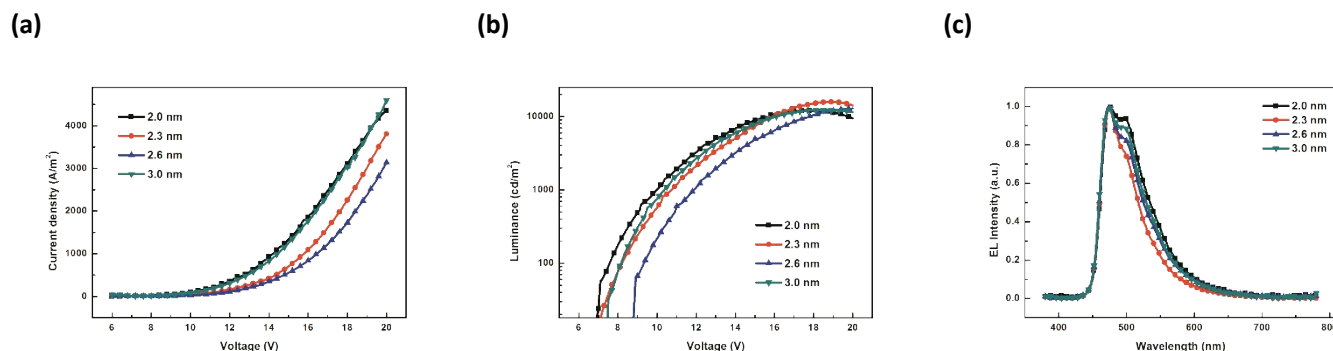

**Figure S2. Performance of solution-processed OLEDs with the light-emitting layers cast from chlorobenzene with varied thickness of  $\text{Cs}_2\text{CO}_3$ .** The structure of OLED is ITO/ PEDOT: PSS (60 nm)/ PVK: OXD-7: 10 wt. % Flrpic (20 mg/mL)/  $\text{Cs}_2\text{CO}_3$  ( $y$  nm)/ Al (150 nm),  $y = 2.0, 2.3, 2.6$  or  $3.0$ . **(a)**  $J$  (current density) versus  $V$  (voltage), **(b)**  $L$  (luminance) versus  $V$  (voltage) characteristics and **(c)** electroluminescent spectra of OLEDs.

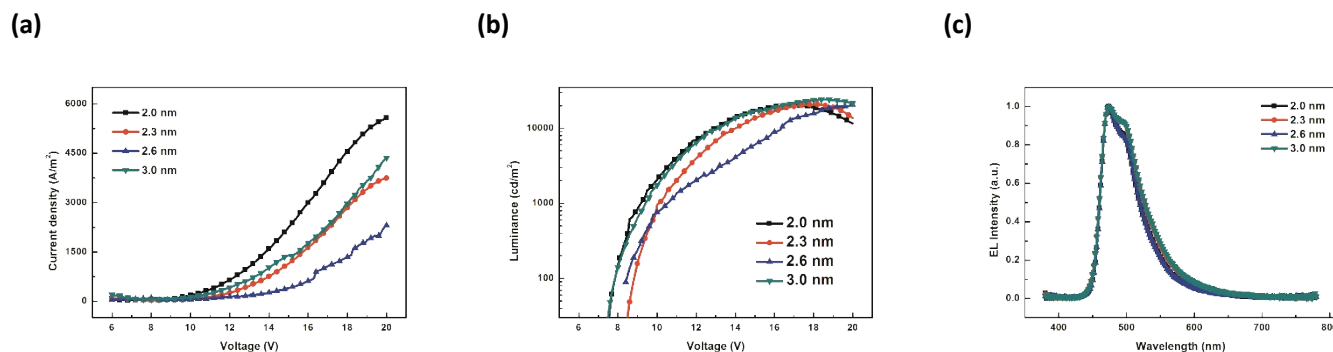

**Figure S3. Performance of solution-processed OLEDs with the light-emitting layers cast from 1,2-dichlorobenzene with varied thickness of  $\text{Cs}_2\text{CO}_3$ .** The structure of OLED is ITO/ PEDOT: PSS (60 nm)/ PVK: OXD-7: 10 wt. % Flrpic (40 mg/mL)/  $\text{Cs}_2\text{CO}_3$  ( $y$  nm)/ Al (150 nm),  $y = 2.0, 2.3, 2.6$  or  $3.0$ . **(a)**  $J$  (current density) versus  $V$  (voltage), **(b)**  $L$  (luminance) versus  $V$  (voltage) characteristics and **(c)** electroluminescent spectra of OLEDs.

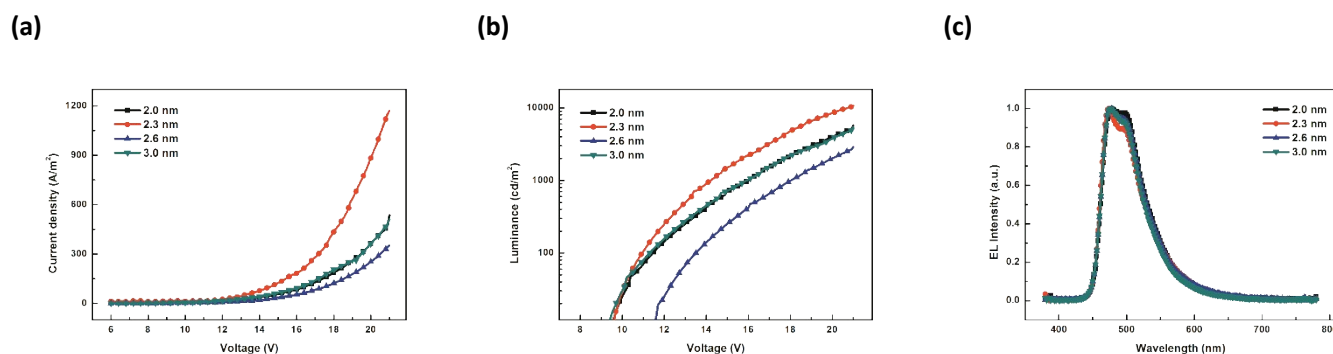

**Table S1. Physical properties of different solvents.**

| Solvent             | Boiling point<br>$T$ [°C] | Viscosity at 25 °C<br>$\tau$ [cps] | Molecular Polarity<br>$\mu$ [D] | Surface tension at 25 °C<br>$\gamma$ [mN/m] |
|---------------------|---------------------------|------------------------------------|---------------------------------|---------------------------------------------|
| 1,2-dichloroethane  | 83.5                      | 0.78                               | 0                               | 31.7                                        |
| chlorobenzene       | 132.2                     | 0.75                               | 2.7                             | 32.5                                        |
| 1,2-dichlorobenzene | 180.4                     | 1.33                               | 2.7                             | 36.2                                        |

**Table S2. Detailed performance of solution-processed OLEDs with the light-emitting layers cast from 1,2-dichloroethane with varied thickness of  $\text{Cs}_2\text{CO}_3$ .** The structure of OLED is ITO/ PEDOT: PSS (60 nm)/ PVK: OXD-7: 10 wt. % Flrpic (10 mg/mL)/  $\text{Cs}_2\text{CO}_3$  ( $y$  nm)/ Al (150 nm).

| $y$ | Turn-on Voltage<br>$V_{\text{on}}$ [V] | Current Efficiency<br>$\eta_{\text{max}}$ [cd/A] | Luminance<br>$L_{\text{max}}$ [cd/m <sup>2</sup> ] | Current Density<br>$J$ [A/m <sup>2</sup> ] at 18 V | Wavelength<br>$\lambda$ [nm] | CIE<br>( $x$ , $y$ ) |
|-----|----------------------------------------|--------------------------------------------------|----------------------------------------------------|----------------------------------------------------|------------------------------|----------------------|
| 2.0 | 6.6                                    | 11.09                                            | $12.02 \times 10^3$                                | 3110                                               | 474                          | (0.20, 0.39)         |
| 2.3 | 6.5                                    | 14.67                                            | $15.81 \times 10^3$                                | 2255                                               | 474                          | (0.17, 0.34)         |
| 2.6 | 8.6                                    | 10.80                                            | $12.89 \times 10^3$                                | 1727                                               | 474                          | (0.19, 0.37)         |
| 3.0 | 7.3                                    | 10.15                                            | $12.18 \times 10^3$                                | 3032                                               | 474                          | (0.19, 0.37)         |

**Table S3. Detailed performance of solution-processed OLEDs with the light-emitting layers cast from chlorobenzene with varied thickness of  $\text{Cs}_2\text{CO}_3$ .** The structure of OLED is ITO/ PEDOT: PSS (60 nm)/ PVK: OXD-7: 10 wt. % Flrpic (20 mg/mL)/  $\text{Cs}_2\text{CO}_3$  ( $y$  nm)/ Al (150 nm).

| $y$ | Turn-on Voltage<br>$V_{\text{on}}$ [V] | Current Efficiency<br>$\eta_{\text{max}}$ [cd/A] | Luminance<br>$L_{\text{max}}$ [cd/m <sup>2</sup> ] | Current Density<br>$J$ [A/m <sup>2</sup> ] at 18 V | Wavelength<br>$\lambda$ [nm] | CIE<br>( $x$ , $y$ ) |
|-----|----------------------------------------|--------------------------------------------------|----------------------------------------------------|----------------------------------------------------|------------------------------|----------------------|
| 2.0 | 7.3                                    | 12.30                                            | $20.03 \times 10^3$                                | 4548                                               | 474                          | (0.16, 0.35)         |
| 2.3 | 8.2                                    | 15.84                                            | $20.72 \times 10^3$                                | 2842                                               | 474                          | (0.18, 0.36)         |
| 2.6 | 8.4                                    | 18.99                                            | $20.50 \times 10^3$                                | 1346                                               | 474                          | (0.16, 0.34)         |
| 3.0 | 7.3                                    | 15.79                                            | $23.90 \times 10^3$                                | 2965                                               | 474                          | (0.18, 0.37)         |

**Table S4. Detailed performance of solution-processed OLEDs with the light-emitting layers cast from 1, 2-dichlorobenzene with varied thickness of  $\text{Cs}_2\text{CO}_3$ .** The structure of OLED is ITO/ PEDOT: PSS (60 nm)/ PVK: OXD-7: 10 wt. % Flrpic (40 mg/mL)/  $\text{Cs}_2\text{CO}_3$  ( $y$  nm)/ Al (150 nm).

| $y$ | Turn-on Voltage<br>$V_{\text{on}}$ [V] | Current Efficiency<br>$\eta_{\text{max}}$ [cd/A] | Luminance<br>$L_{\text{max}}$ [cd/m <sup>2</sup> ] | Current Density<br>$J$ [A/m <sup>2</sup> ] at 18 V | Wavelength<br>$\lambda$ [nm] | CIE<br>( $x$ , $y$ ) |
|-----|----------------------------------------|--------------------------------------------------|----------------------------------------------------|----------------------------------------------------|------------------------------|----------------------|
| 2.0 | 9.1                                    | 12.58                                            | $5.75 \times 10^3$                                 | 185                                                | 478                          | (0.18, 0.40)         |
| 2.3 | 9.3                                    | 12.51                                            | $10.71 \times 10^3$                                | 434                                                | 474                          | (0.18, 0.37)         |
| 2.6 | 11.2                                   | 8.39                                             | $2.87 \times 10^3$                                 | 122                                                | 478                          | (0.18, 0.38)         |
| 3.0 | 9.0                                    | 11.61                                            | $5.34 \times 10^3$                                 | 206                                                | 476                          | (0.17, 0.37)         |
