# Supplementary figures and images for: Toward highly efficient blue organic light-emitting diodes: fabricating a good-quality emissive layer cast from suitable solvents
Source: Royal Society of Chemistry journal article supplement (doi:10.1039/c5dt03776j), 2015-11-09

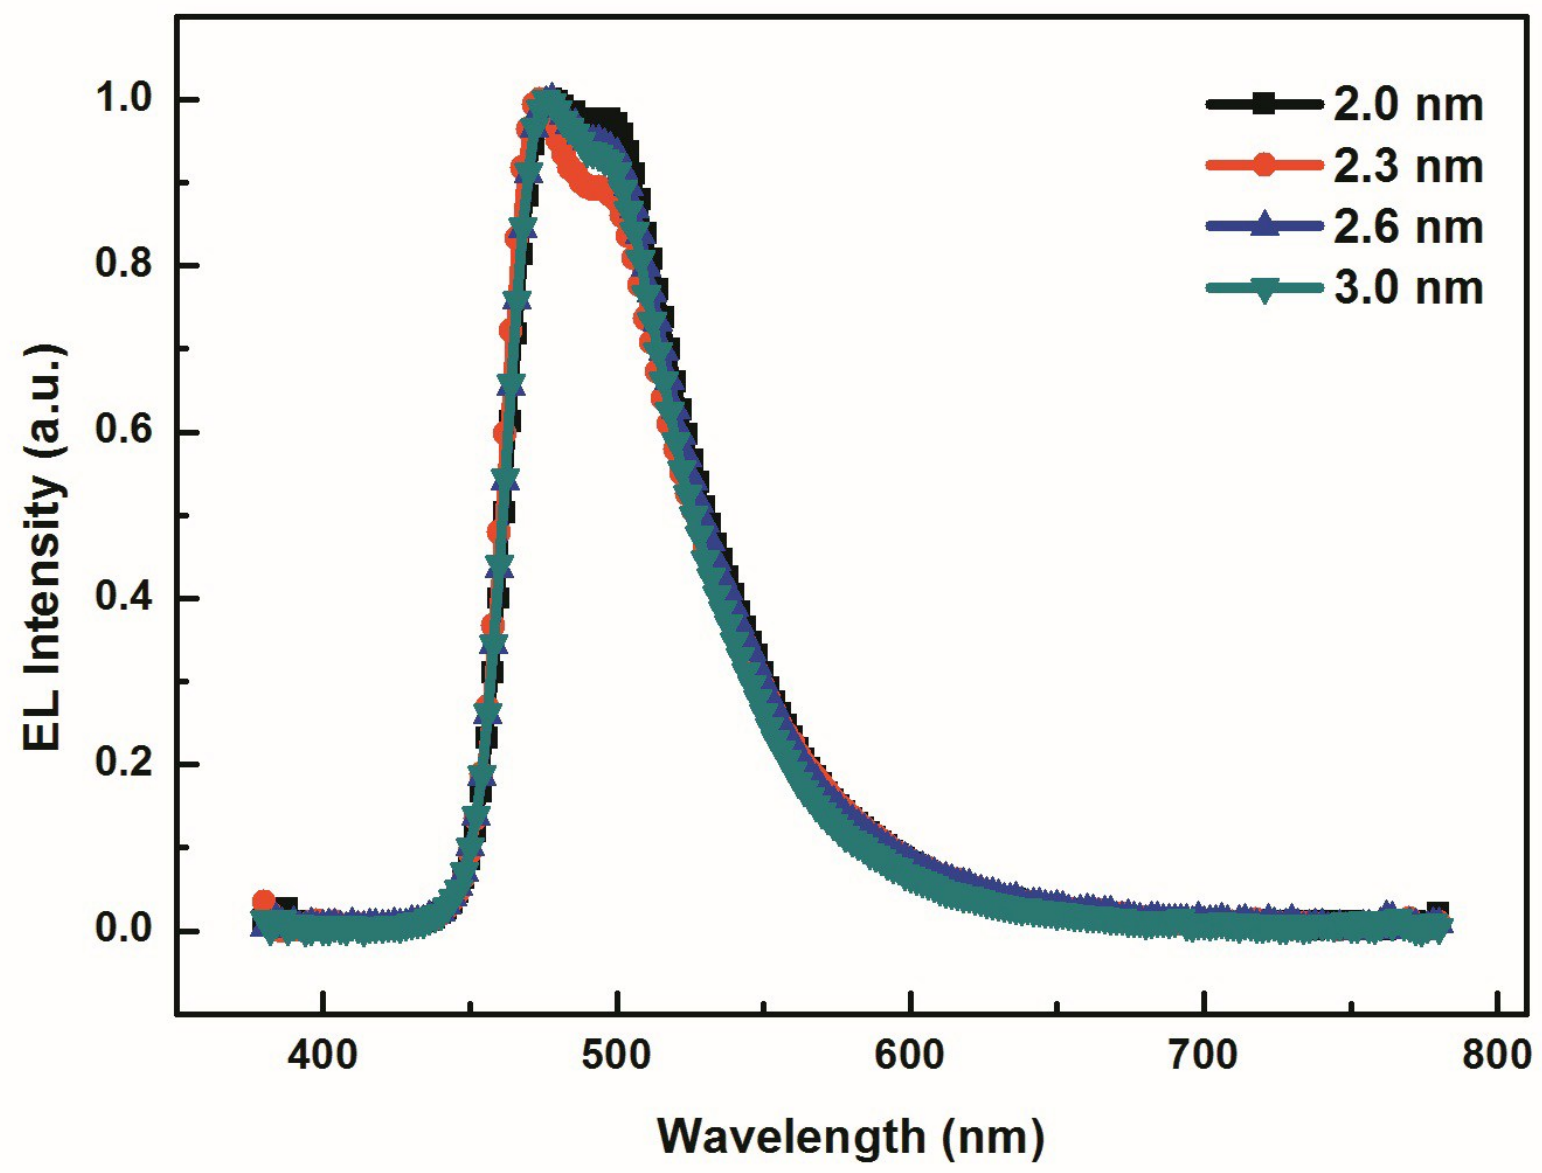

Supplement: c5dt03776j10.pdf [file c5dt03776j10.pdf]

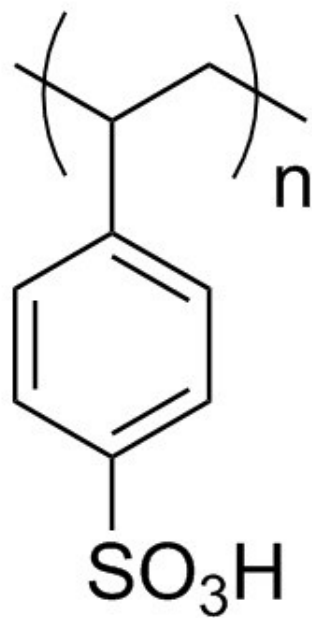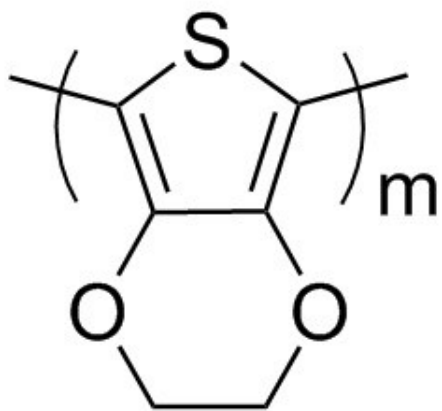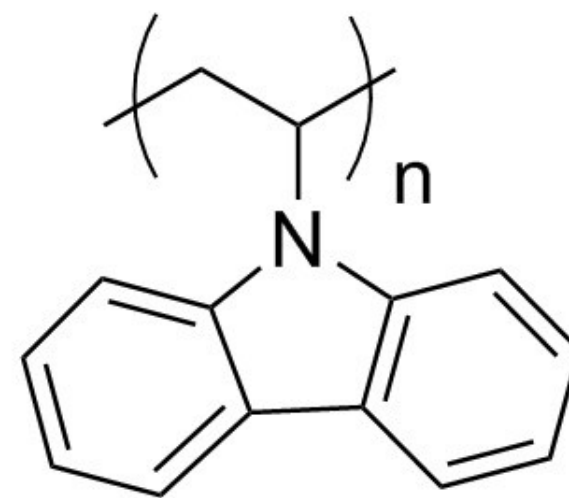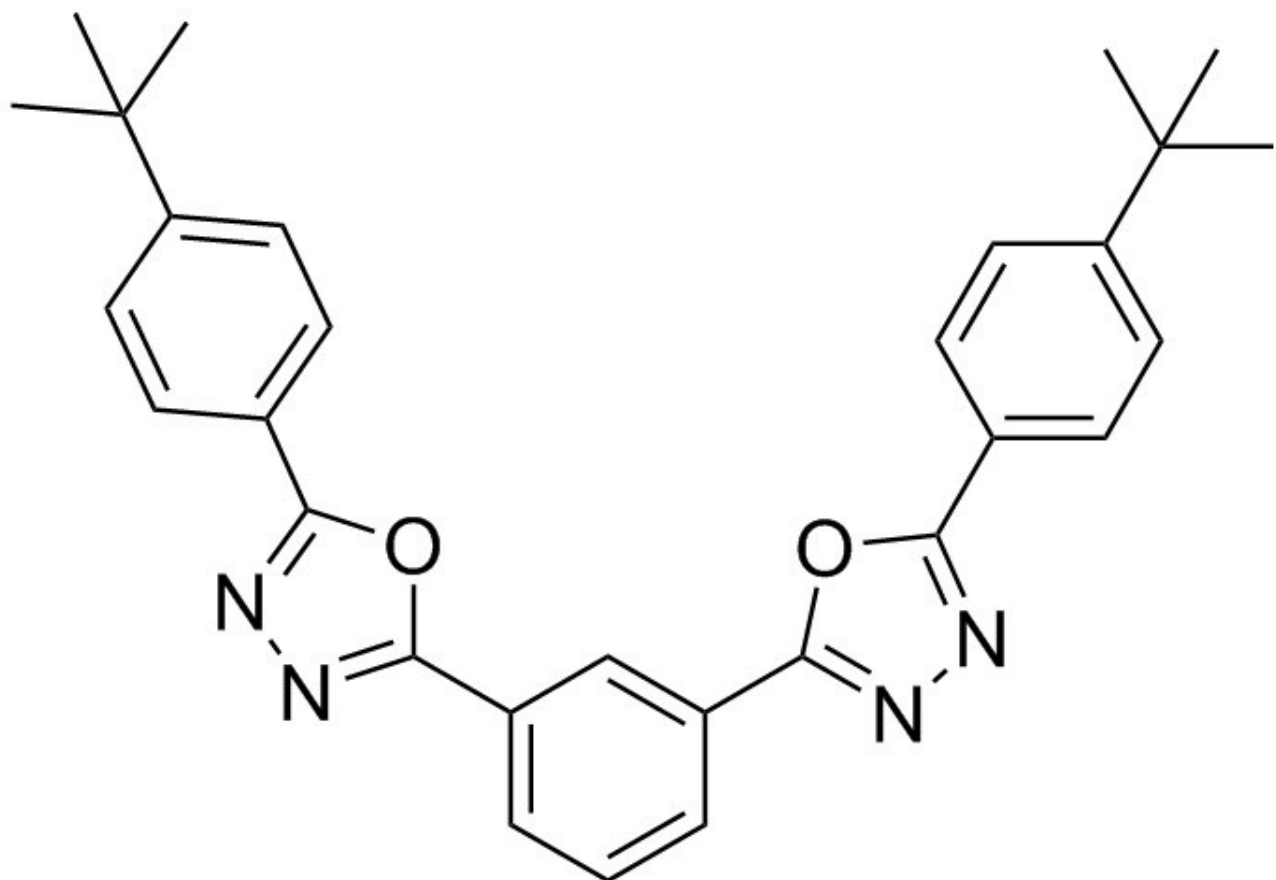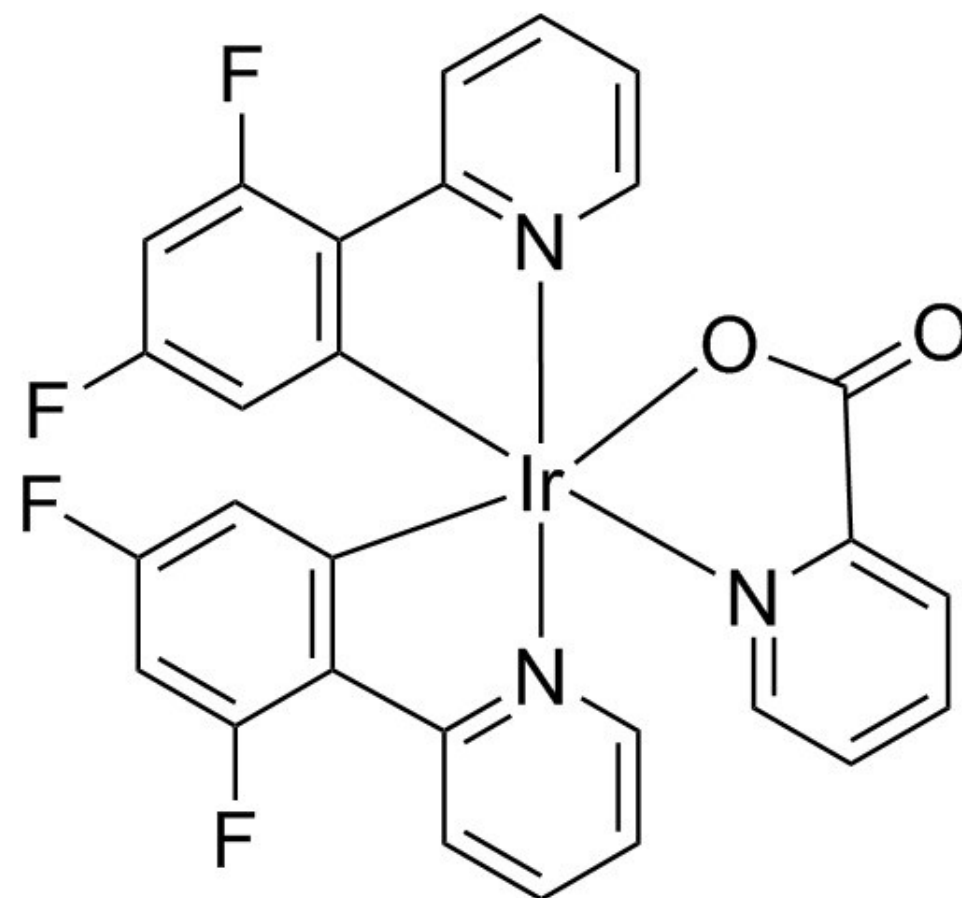

Supplement: c5dt03776j11.pdf [file c5dt03776j11.pdf]

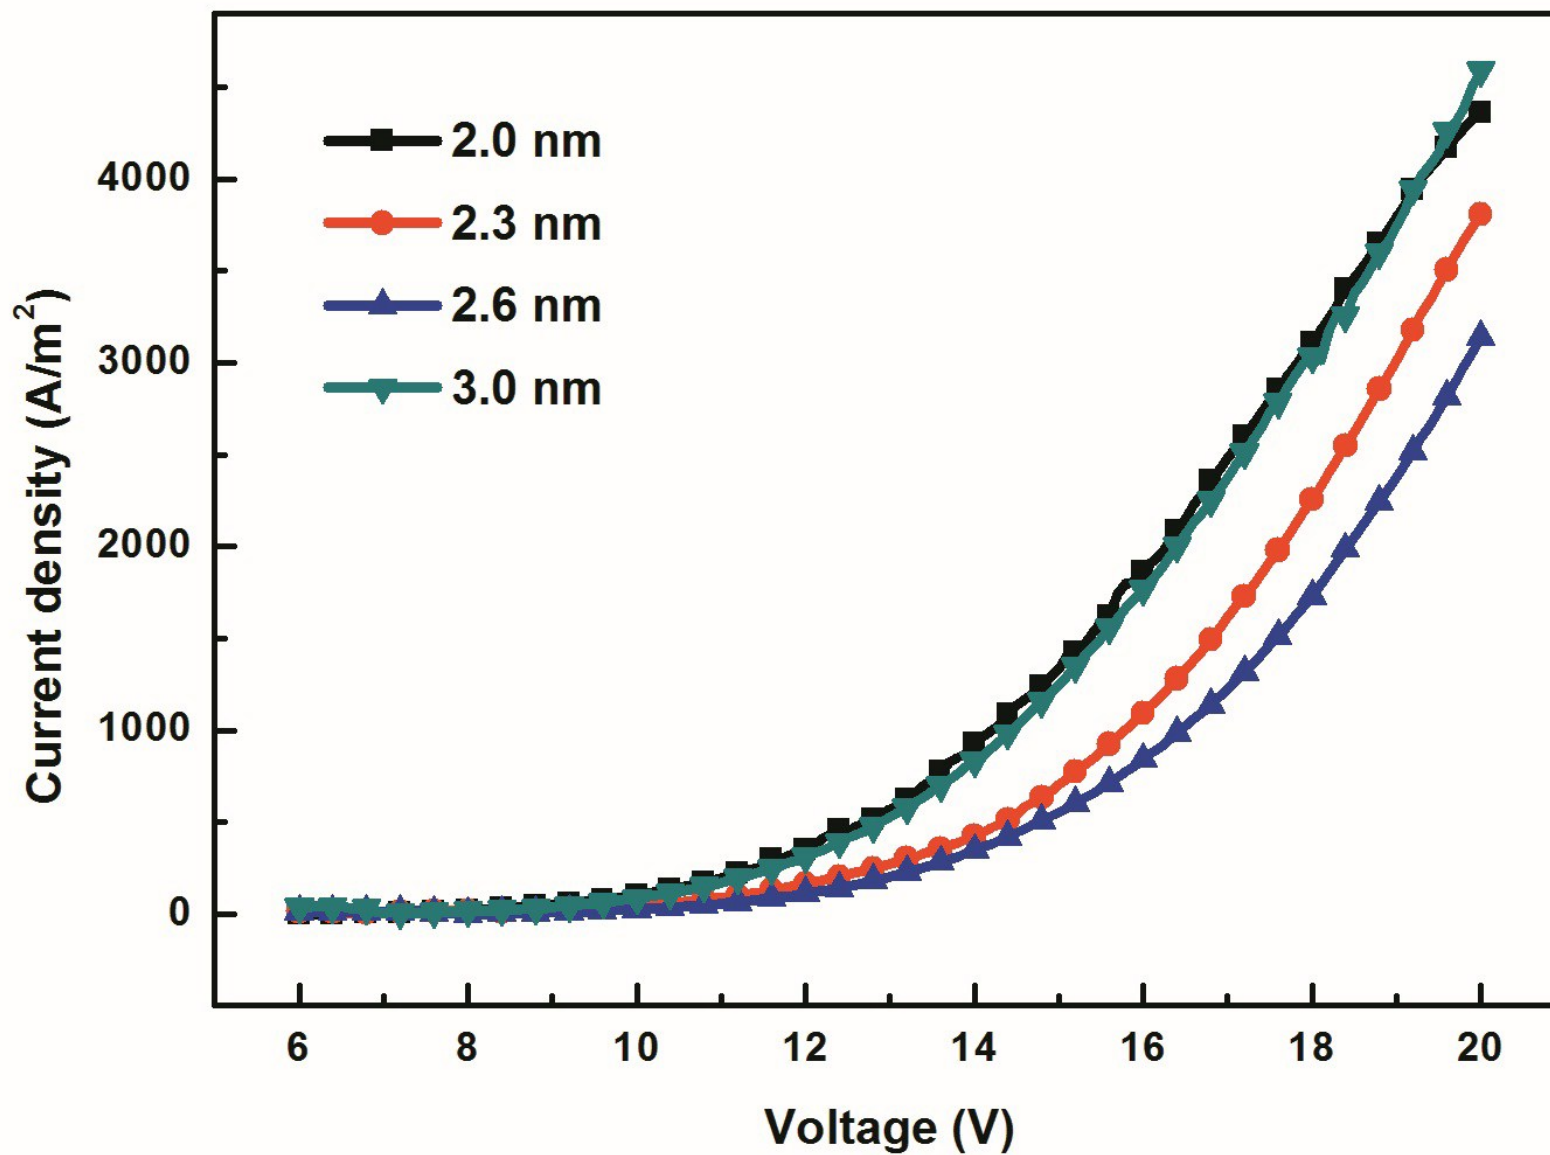

Supplement: c5dt03776j2.pdf [file c5dt03776j2.pdf]

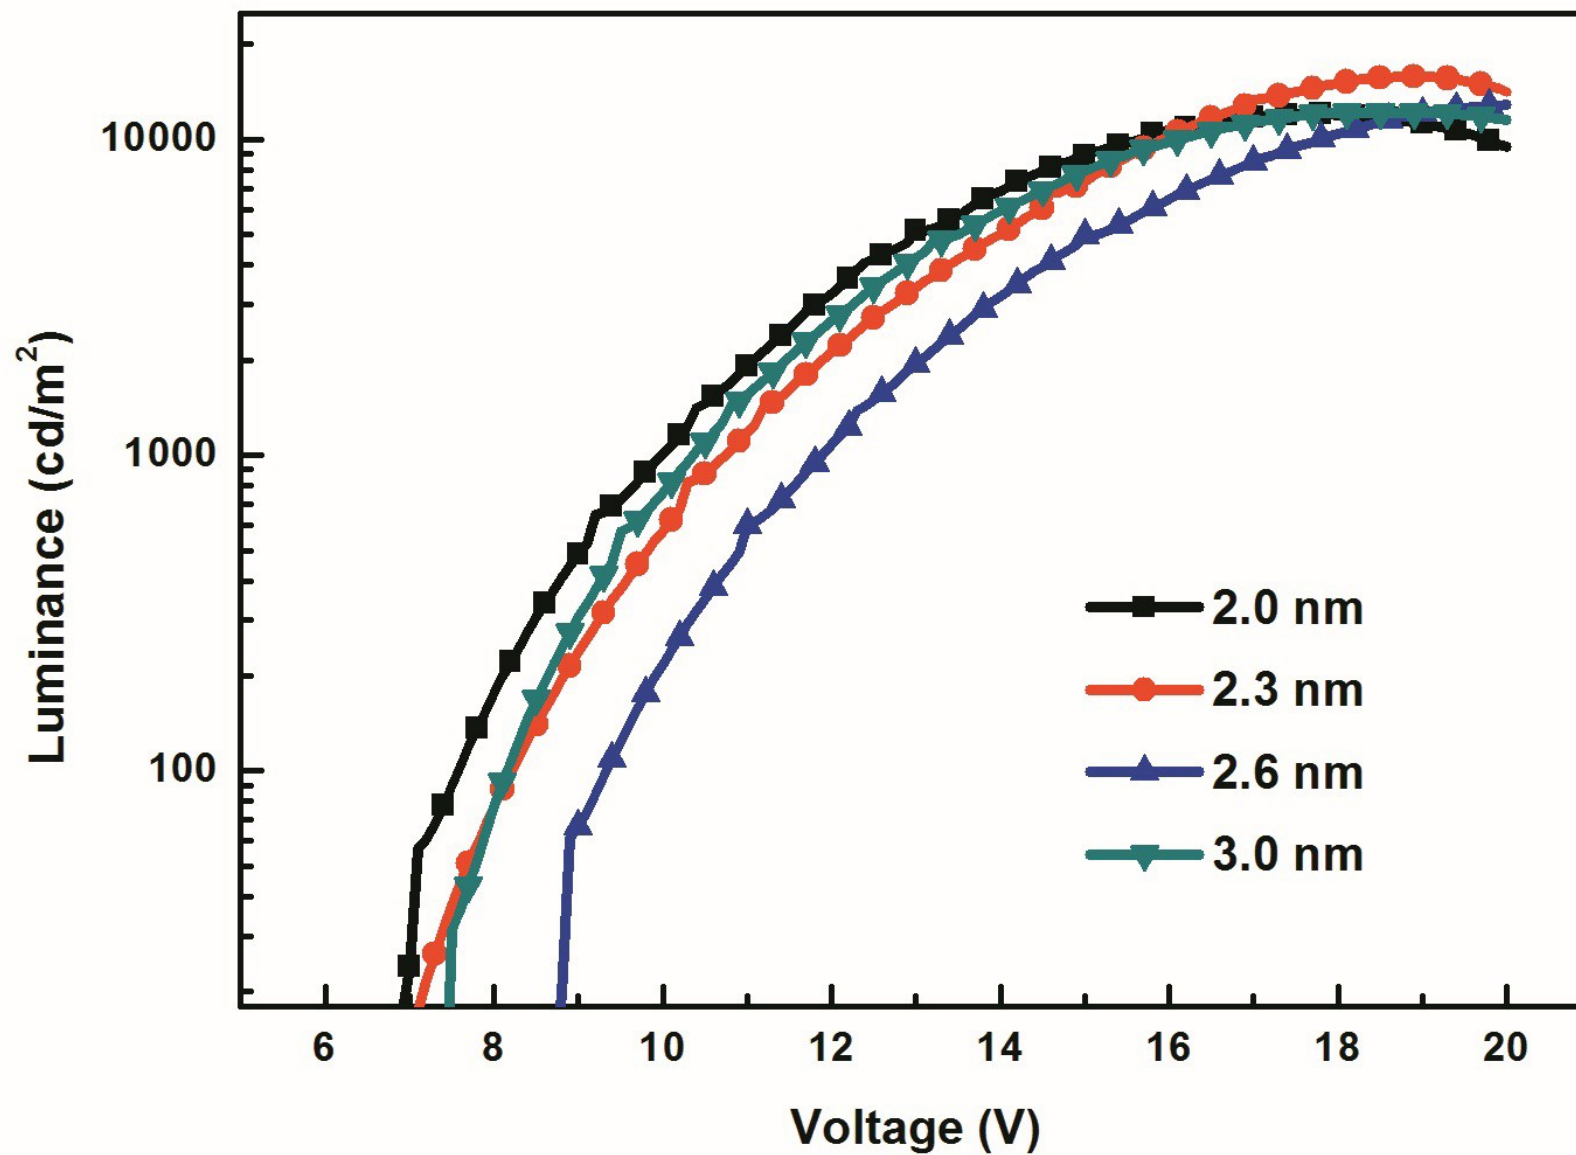

Supplement: c5dt03776j3.pdf [file c5dt03776j3.pdf]

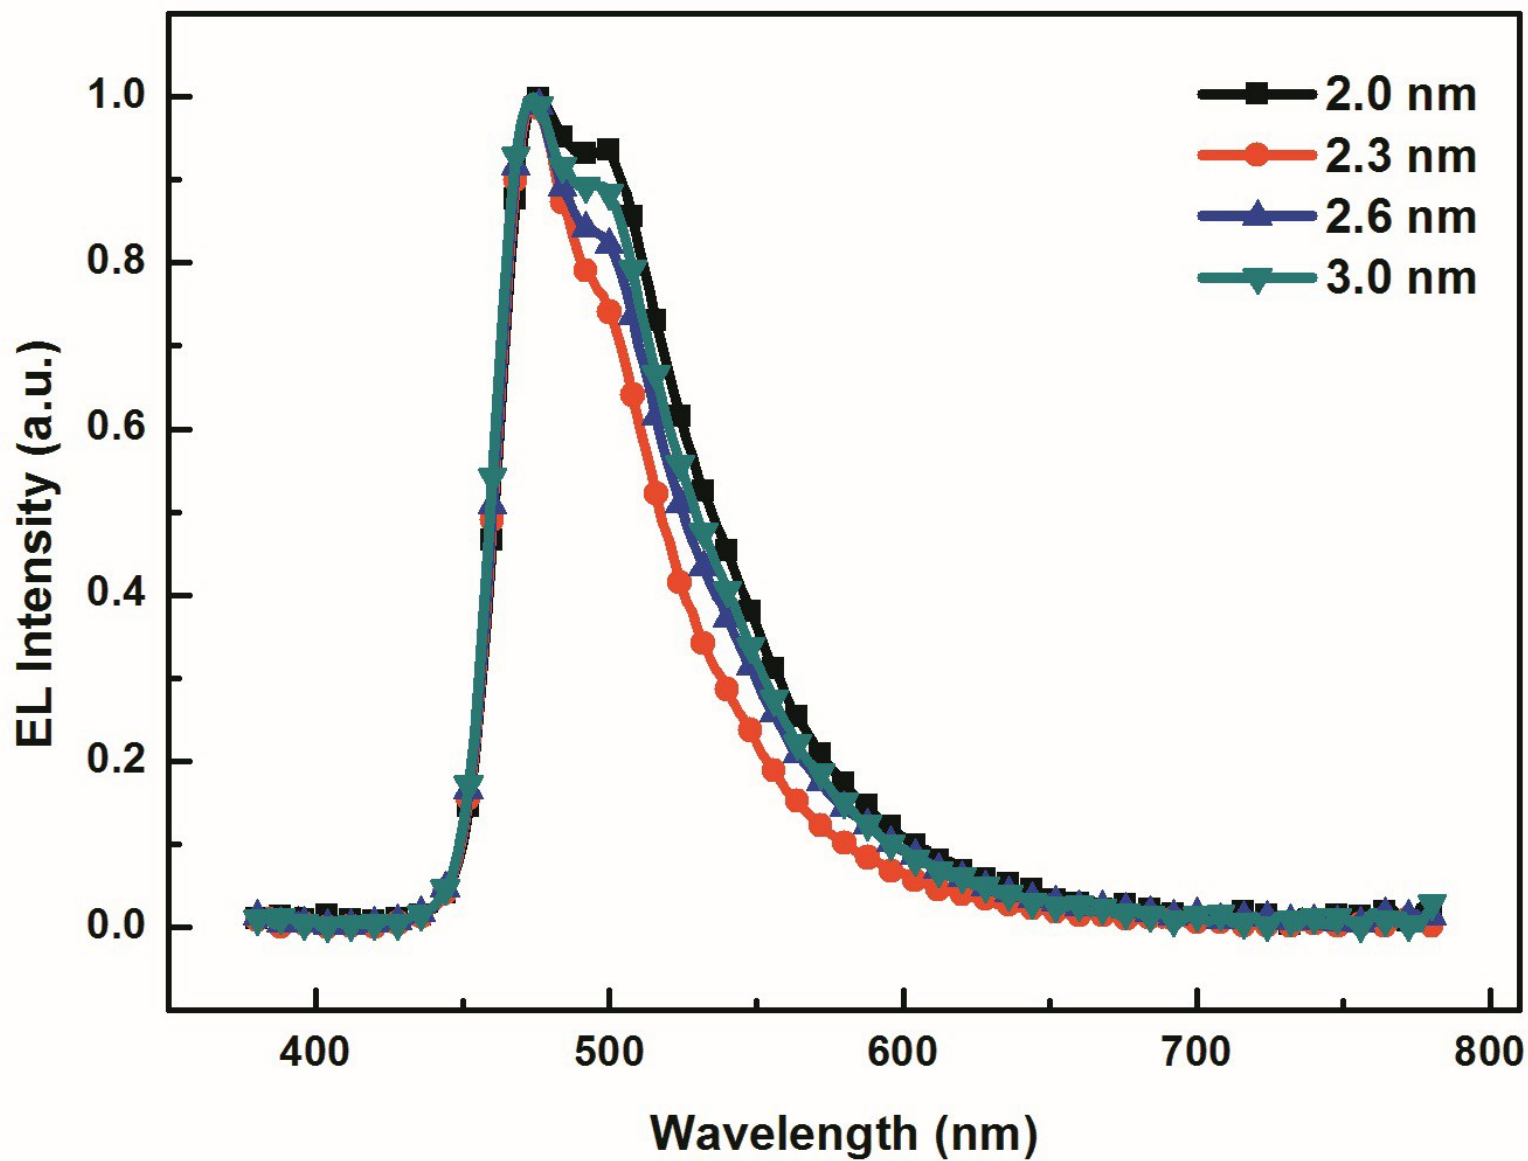

Supplement: c5dt03776j4.pdf [file c5dt03776j4.pdf]

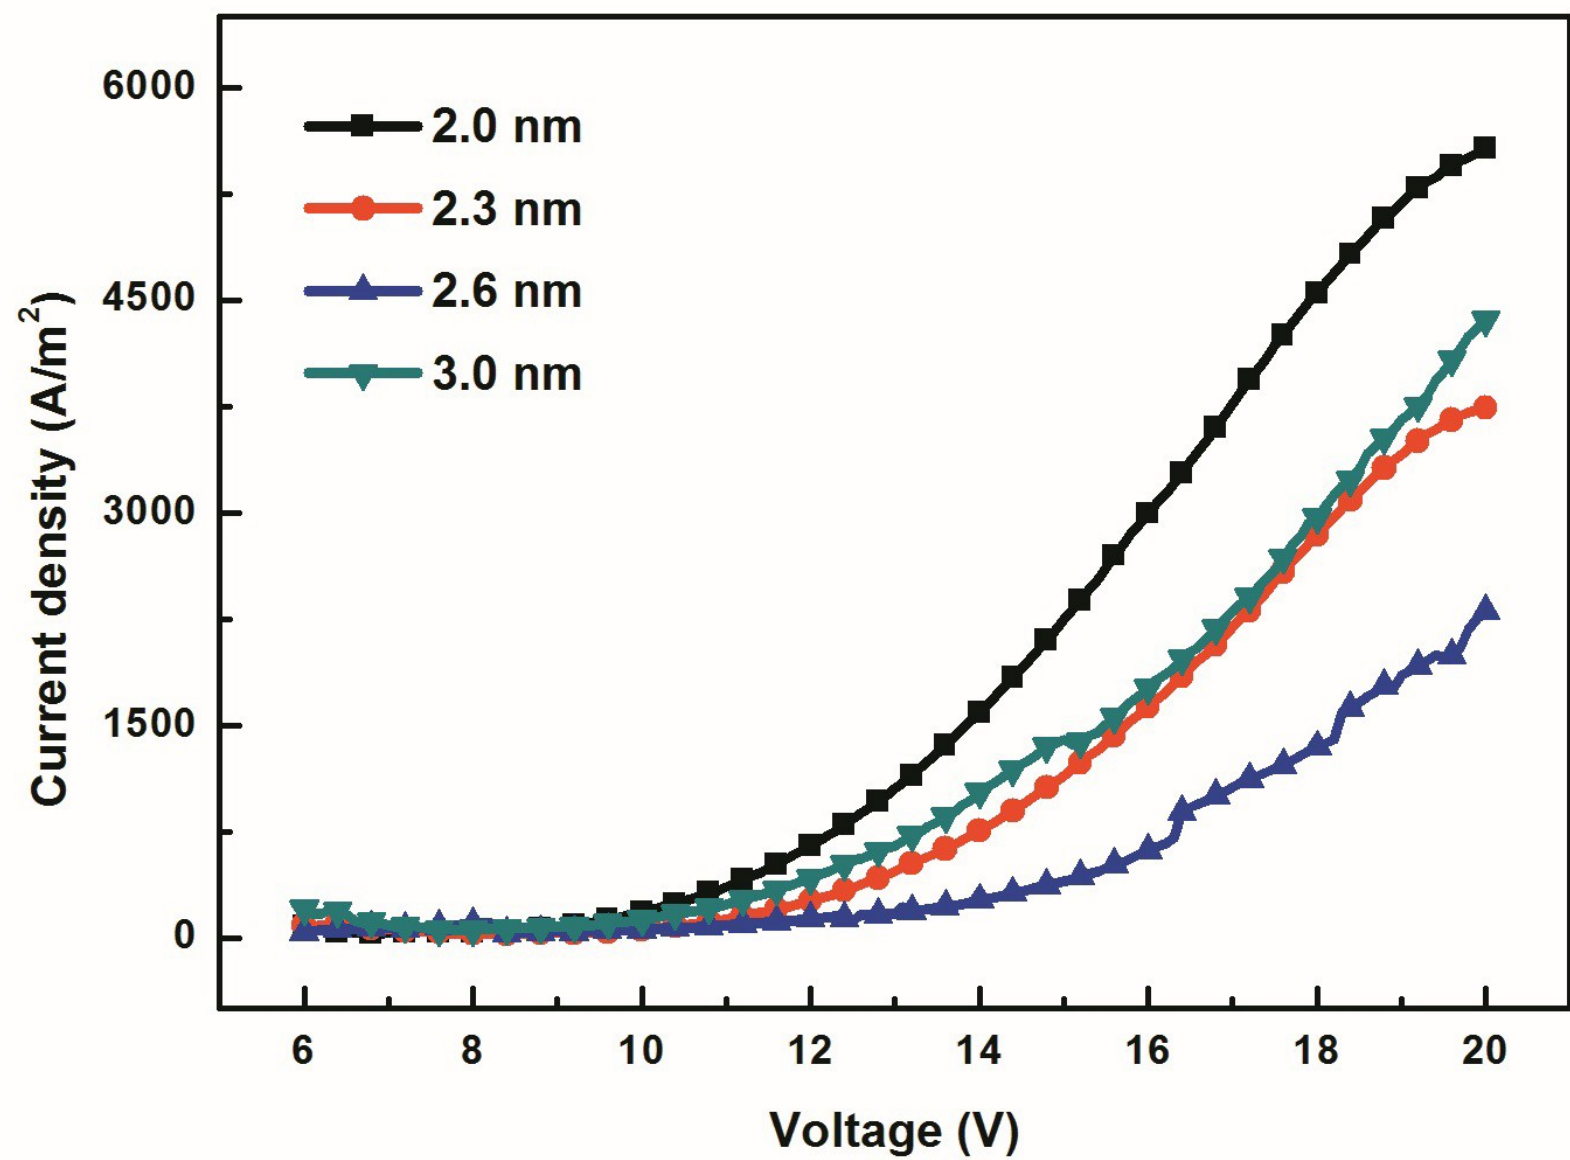

Supplement: c5dt03776j5.pdf [file c5dt03776j5.pdf]

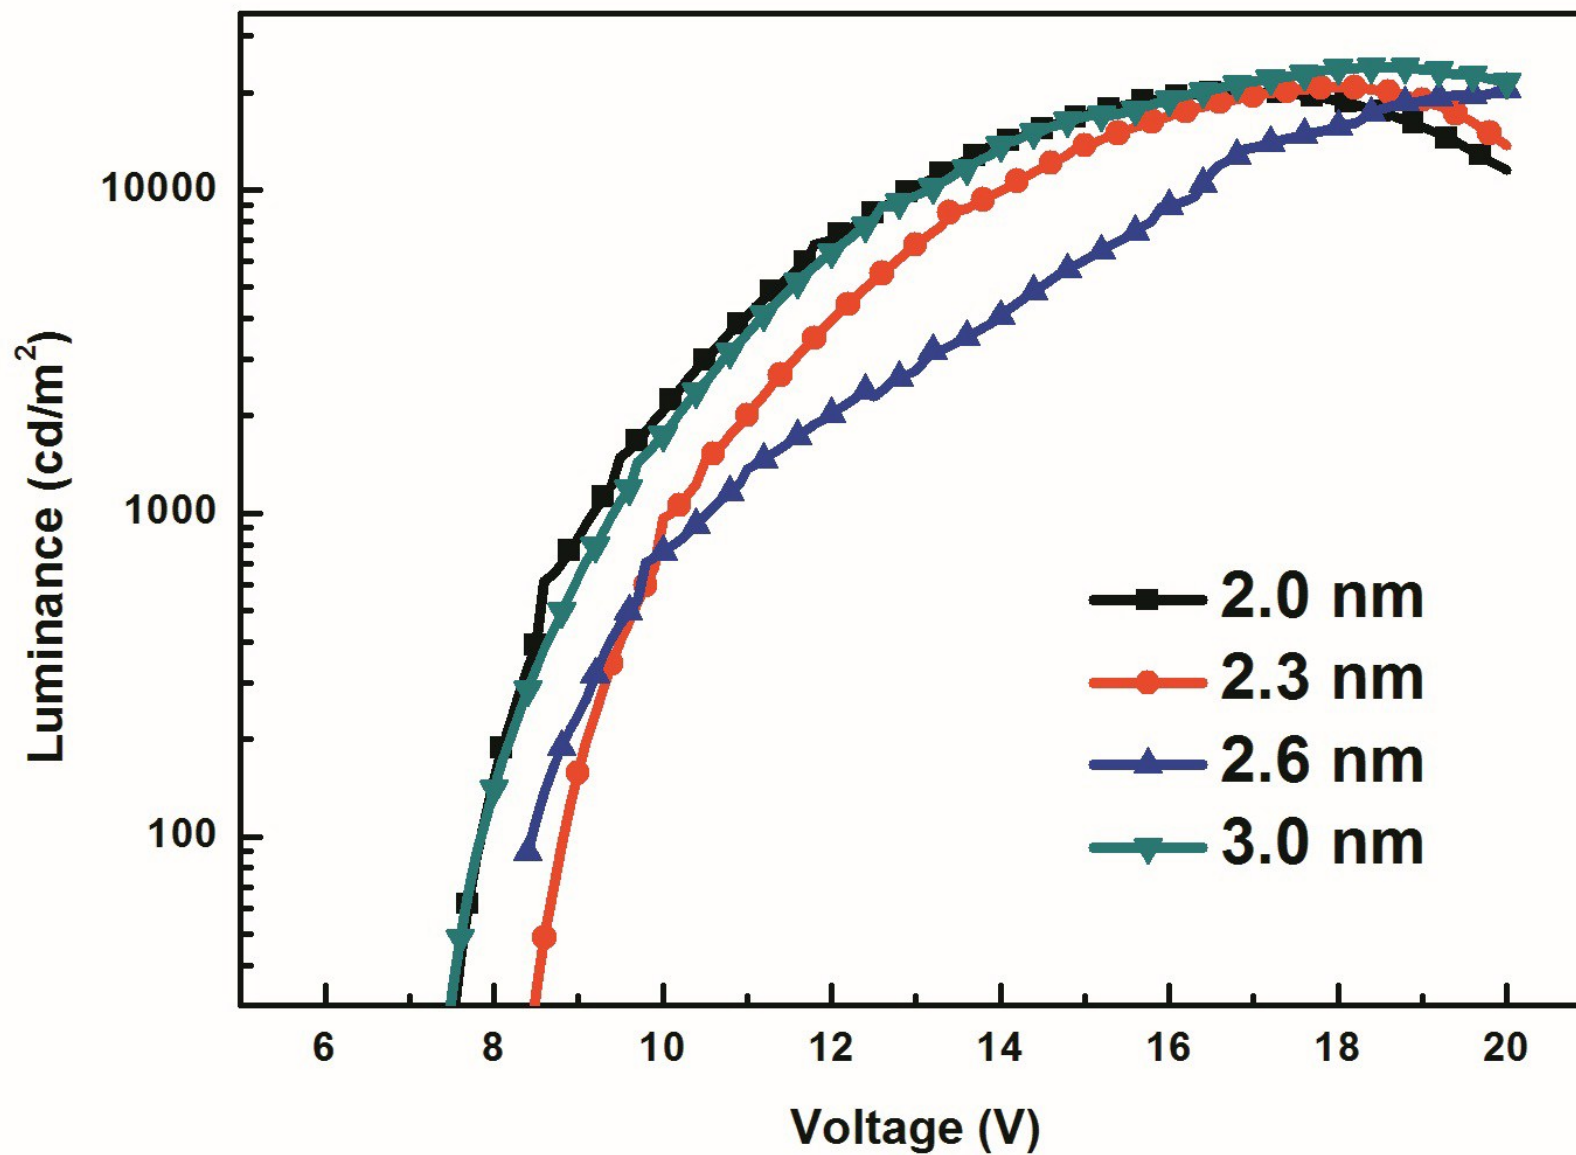

Supplement: c5dt03776j6.pdf [file c5dt03776j6.pdf]

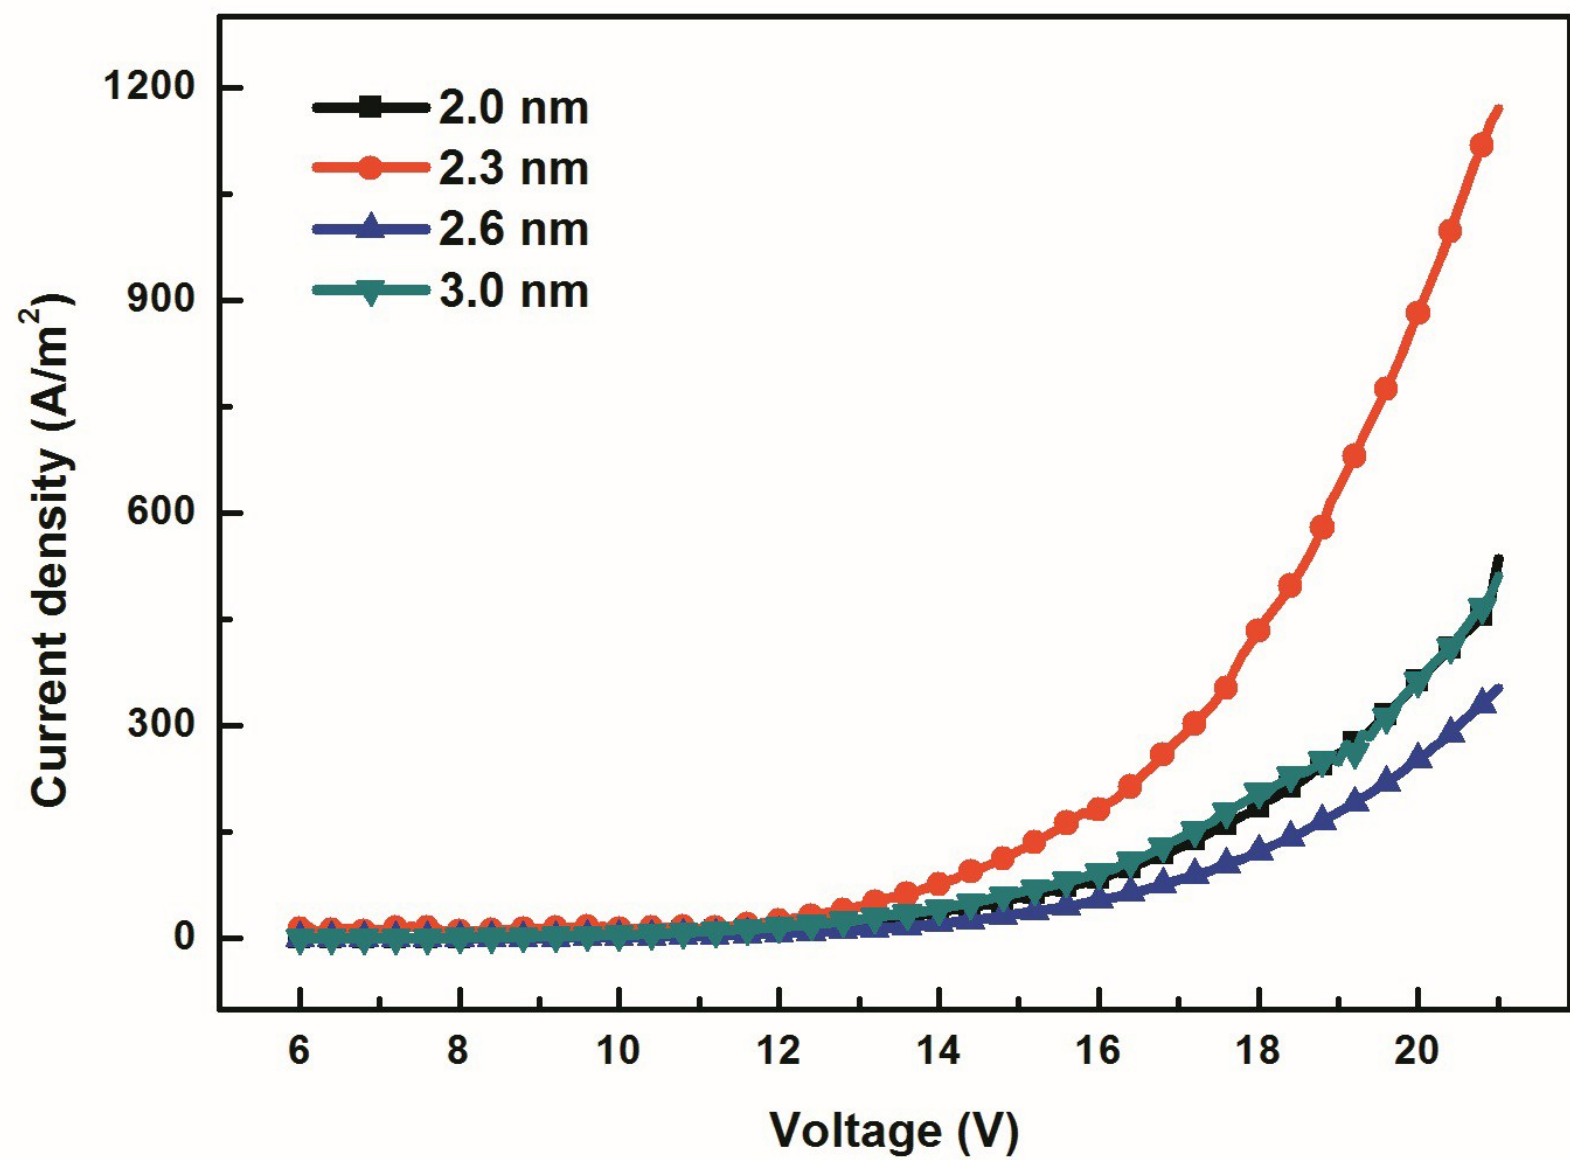

Supplement: c5dt03776j8.pdf [file c5dt03776j8.pdf]
